# Supplementary material
Source: PubMed Central journal article supplement (PMC3074419)
Supplement: supp_00757.2010_suppdata.pdf [file supp_00757.2010_suppdata.pdf]

24 the springs. These data suggest that there is no significant association between neural activity  
25 related to differences in dexterity requirements and EMG activity, and importantly, that muscle  
26 co-contraction does not account for the neural correlates of dexterity index. Thus these results  
27 are in agreement with other evidence that the task of compressing springs is likely a  
28 sensorimotor integration task that does not rely on stiffening the fingers (Venkadesan et al.  
29 2007).

30 Overall, for the effect of task, there was statistically significant correlation between the  
31 EMG time-series and activity in the contralateral dorsal premotor and prefrontal areas (superior  
32 and middle frontal gyrus), left caudate and right thalamus. Specifically, correlation of EMG  
33 time-series with fMRI series was observed in the contralateral precentral gyrus, middle frontal  
34 gyrus and right inferior frontal gyrus for both sustained and cyclic compression tasks. However,  
35 the EMG was also correlated with the right postcentral gyrus (SI) and right culmen of the  
36 cerebellum in sustained compression tasks. In contrast, for the cyclic compression task,  
37 correlation was identified with activity in the right inferior parietal lobule. Due to the slow time  
38 course of the fMRI signal, the correlation between the EMG time-series and the fMRI time-  
39 series reflects temporal covariation in activity and not a stimulus response or stimulus coupling  
40 effect. Thus, the correlation between the EMG signal and activity in premotor, sensory and  
41 parietal cortex or other subcortical or cerebellar sites likely reflects motor output modulation of  
42 the dynamical regulation of fingertip forces and on-line error correction. Notably, other studies  
43 have suggested that EMG activity in the hand or arm is associated with premotor activity due to  
44 facilitatory input to M1 from ventral premotor cortex and SMA (Cerri et al. 2003; Boudrias,  
45 2006). Our findings suggest that EMG activity is associated with task stability requirements  
46 primarily in motor planning areas. However, the requirements for stability control in the single

47 compression task result in co-variation of hand muscle activity and activity in sensory input  
48 networks, whereas the cyclic compression tasks reflect processing in parietal sensorimotor  
49 integration or planning areas. Lastly, in interaction effects, EMG activity was correlated only  
50 with activity in the insula.

## 51 **Discussion**

52 We compared the time-series of EMG activity with the fMRI time-series to determine  
53 whether EMG activity correlated with activity in specific brain regions. We found that for  
54 sustained compression tasks, EMG activity was highly correlated with activity in SI and the  
55 cerebellum lending further support to the hypothesis that control of fingertip force direction in  
56 sustained compression involves increased sensorimotor integration. Furthermore, in the cyclic  
57 compression task, EMG activity was highly correlated with activity in the inferior parietal lobule  
58 supporting the idea of coordination of fingertip force direction across multiple joints or effectors  
59 involve sensorimotor integration in the parietal cortex. Finally, in interaction effects, EMG  
60 activity was correlated with activity only in the insula, supporting the idea that the insula may act  
61 to select the appropriate sensory model in sensorimotor integration.

## 62 **References**

- 63 1. Venkadesan, M., Guckenheimer, J., Valero-Cuevas F.J. (2007). Manipulating the edge of  
64 instability. *J. Biomech.* 40(8): 1653-1661.
- 65 2. Boudrias, M-H, Belhaj-Saif, A., Park, M.C. et al. (2006) .Contrasting Properties of Motor  
66 Output from the Supplementary Motor Area and Primary Motor Cortex in Rhesus Macaques.  
67 *Cerebral Cortex* 16: 632-638.
- 68 3. Cerri, G., Shimazu, H., Maier, M.A., et al. (2003) Facilitation from Ventral Premotor Cortex  
69 of Primary Motor Cortex Outputs to Macaque Hand Muscles. *J. Neurophysiol.* 90: 832-842.

70 **Figures**

71

72

73

74

75

76

77

78

79

80

81

82

83

84

85

86

87

88

89

90

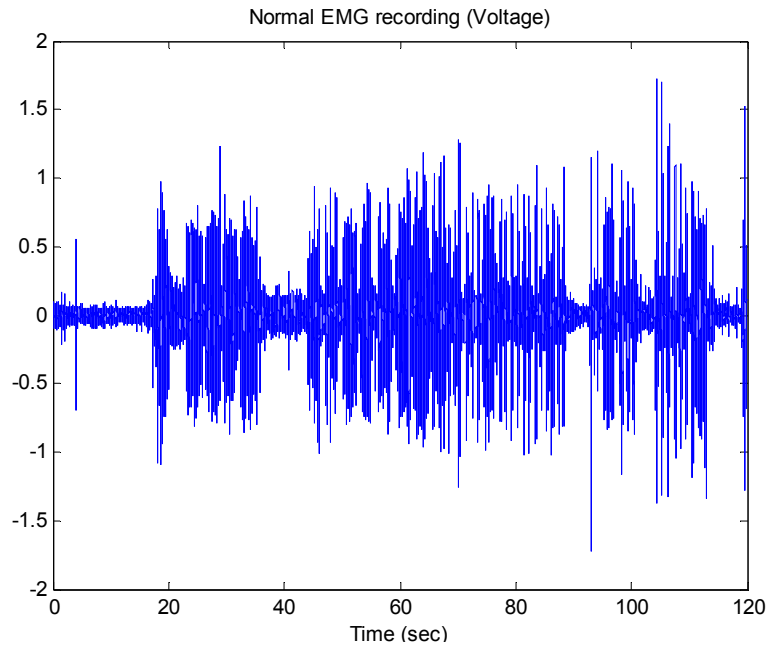

**Figure 1A:** Raw EMG signals recorded during sustained and cyclic precision grip outside of the MRI scanner.

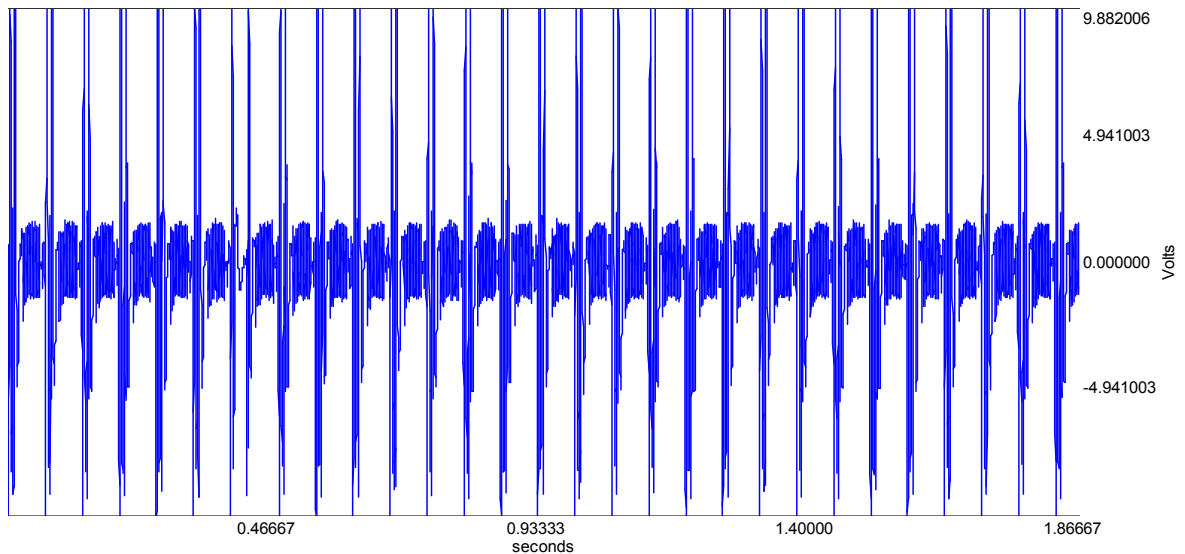

**Figure 1B:** Raw EMG signals from a single subject recorded during sustained and cyclic precision grip of spring #4 in the MRI scanner while acquiring images with the EPI pulse sequence used for the fMRI data acquisition.

91

92

93

94

95

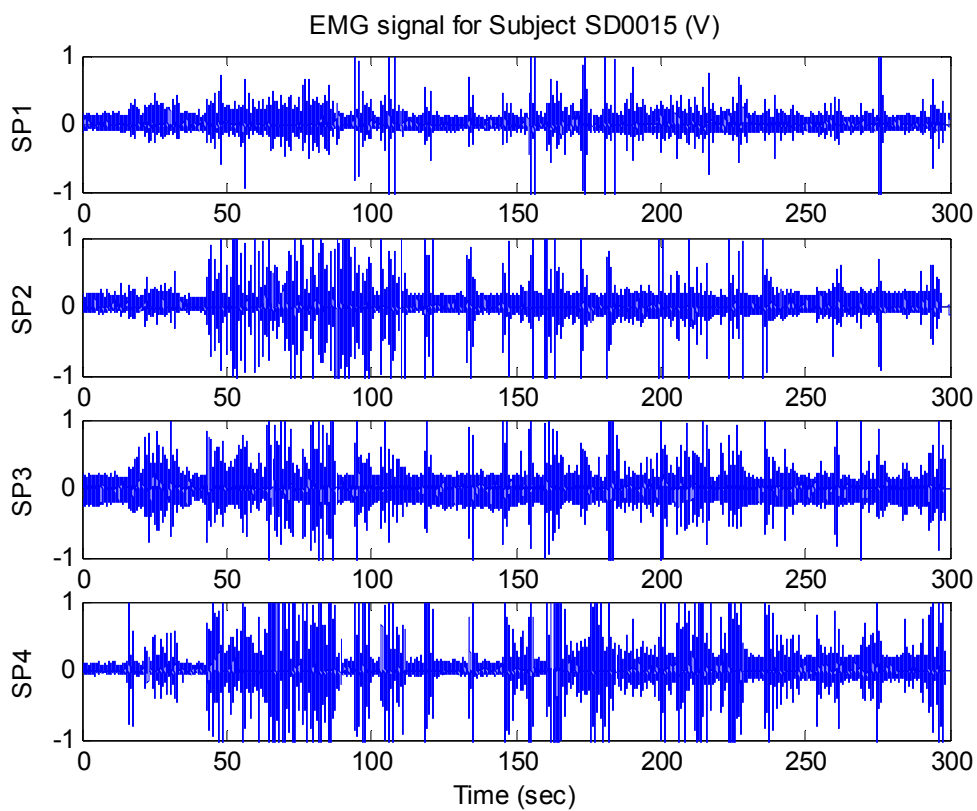

**Figure 1C:** Raw EMG signals for a single subject recorded during sustained and cyclic precision grip of the four springs in the MRI scanner after post-processing and filtering.
